# Supplementary material for: Up-regulation of exosomal miR-125a in pneumoconiosis inhibits lung cancer development by suppressing expressions of EZH2 and hnRNPK
Source: Royal Society of Chemistry journal article supplement (doi:10.1039/c8ra03081b), 2018-01-01
Supplement: c8ra03081b1.pdf [file c8ra03081b1.pdf]

Supplemental Table

Table S1. Target genes of miR-125a predicted by MR-microT method

| No | miRNA       | miRNA Sequence           | Gene Ensembl ID | Gene Symbol | microT Score |
|----|-------------|--------------------------|-----------------|-------------|--------------|
| 1  | miR-125a-5p | >UCCCUGAGACCCUUUAACCGUGA | ENSG00000133816 | MICAL2      | 0.998        |
| 2  | miR-125a-5p | >UCCCUGAGACCCUUUAACCGUGA | ENSG00000102908 | NFAT5       | 0.992        |
| 3  | miR-125a-5p | >UCCCUGAGACCCUUUAACCGUGA | ENSG00000102935 | ZNF423      | 0.990        |
| 4  | miR-125a-5p | >UCCCUGAGACCCUUUAACCGUGA | ENSG00000197372 | ZNF675      | 0.987        |
| 5  | miR-125a-5p | >UCCCUGAGACCCUUUAACCGUGA | ENSG00000149932 | TMEM219     | 0.987        |
| 6  | miR-125a-5p | >UCCCUGAGACCCUUUAACCGUGA | ENSG0000043143  | JADE2       | 0.985        |
| 7  | miR-125a-5p | >UCCCUGAGACCCUUUAACCGUGA | ENSG00000155506 | LARP1       | 0.981        |
| 8  | miR-125a-5p | >UCCCUGAGACCCUUUAACCGUGA | ENSG00000198963 | RORB        | 0.979        |
| 9  | miR-125a-5p | >UCCCUGAGACCCUUUAACCGUGA | ENSG00000178217 | SH2D4B      | 0.976        |
| 10 | miR-125a-5p | >UCCCUGAGACCCUUUAACCGUGA | ENSG00000166135 | HIF1AN      | 0.976        |
| 11 | miR-125a-5p | >UCCCUGAGACCCUUUAACCGUGA | ENSG00000146676 | PURB        | 0.973        |
| 12 | miR-125a-5p | >UCCCUGAGACCCUUUAACCGUGA | ENSG00000279317 | AC06994.2   | 0.970        |
| 13 | miR-125a-5p | >UCCCUGAGACCCUUUAACCGUGA | ENSG00000172943 | PHF8        | 0.966        |
| 14 | miR-125a-5p | >UCCCUGAGACCCUUUAACCGUGA | ENSG00000275034 | TP53TG3E    | 0.966        |
| 15 | miR-125a-5p | >UCCCUGAGACCCUUUAACCGUGA | ENSG00000100325 | ASCC2       | 0.964        |
| 16 | miR-125a-5p | >UCCCUGAGACCCUUUAACCGUGA | ENSG00000188211 | NCR3LG1     | 0.962        |
| 17 | miR-125a-5p | >UCCCUGAGACCCUUUAACCGUGA | ENSG00000213462 | ERV3-1      | 0.959        |
| 18 | miR-125a-5p | >UCCCUGAGACCCUUUAACCGUGA | ENSG00000163807 | KIAA1143    | 0.957        |
| 19 | miR-125a-5p | >UCCCUGAGACCCUUUAACCGUGA | ENSG00000204103 | MAFB        | 0.955        |
| 20 | miR-125a-5p | >UCCCUGAGACCCUUUAACCGUGA | ENSG00000166263 | STXBP4      | 0.953        |
| 21 | miR-125a-5p | >UCCCUGAGACCCUUUAACCGUGA | ENSG00000163249 | CCNYL1      | 0.952        |
| 22 | miR-125a-5p | >UCCCUGAGACCCUUUAACCGUGA | ENSG00000205456 | TP53TG3D    | 0.947        |
| 23 | miR-125a-5p | >UCCCUGAGACCCUUUAACCGUGA | ENSG0000046774  | MAGEC2      | 0.946        |
| 24 | miR-125a-5p | >UCCCUGAGACCCUUUAACCGUGA | ENSG00000091622 | PITPNM3     | 0.945        |
| 25 | miR-125a-5p | >UCCCUGAGACCCUUUAACCGUGA | ENSG00000173436 | MINOS1      | 0.940        |
| 26 | miR-125a-5p | >UCCCUGAGACCCUUUAACCGUGA | ENSG00000066427 | ATXN3       | 0.938        |
| 27 | miR-125a-5p | >UCCCUGAGACCCUUUAACCGUGA | ENSG00000132842 | AP3B1       | 0.929        |
| 28 | miR-125a-5p | >UCCCUGAGACCCUUUAACCGUGA | ENSG00000205659 | LIN52       | 0.928        |
| 29 | miR-125a-5p | >UCCCUGAGACCCUUUAACCGUGA | ENSG00000278848 | TP53TG3F    | 0.926        |
| 30 | miR-125a-5p | >UCCCUGAGACCCUUUAACCGUGA | ENSG00000188807 | TMEM201     | 0.926        |
| 31 | miR-125a-5p | >UCCCUGAGACCCUUUAACCGUGA | ENSG00000074706 | IPCEF1      | 0.923        |
| 32 | miR-125a-5p | >UCCCUGAGACCCUUUAACCGUGA | ENSG00000114861 | FOXP1       | 0.923        |
| 33 | miR-125a-5p | >UCCCUGAGACCCUUUAACCGUGA | ENSG00000112182 | BACH2       | 0.922        |
| 34 | miR-125a-5p | >UCCCUGAGACCCUUUAACCGUGA | ENSG00000183632 | TP53TG3     | 0.922        |
| 35 | miR-125a-5p | >UCCCUGAGACCCUUUAACCGUGA | ENSG00000121579 | NAA50       | 0.919        |
| 36 | miR-125a-5p | >UCCCUGAGACCCUUUAACCGUGA | ENSG00000185565 | LSAMP       | 0.919        |
| 37 | miR-125a-5p | >UCCCUGAGACCCUUUAACCGUGA | ENSG00000110900 | TSPAN11     | 0.918        |
| 38 | miR-125a-5p | >UCCCUGAGACCCUUUAACCGUGA | ENSG00000114735 | HEMK1       | 0.915        |
| 39 | miR-125a-5p | >UCCCUGAGACCCUUUAACCGUGA | ENSG00000182175 | RGMA        | 0.914        |
| 40 | miR-125a-5p | >UCCCUGAGACCCUUUAACCGUGA | ENSG00000160785 | SLC25A44    | 0.914        |
| 41 | miR-125a-5p | >UCCCUGAGACCCUUUAACCGUGA | ENSG00000134030 | CTIF        | 0.910        |
| 42 | miR-125a-5p | >UCCCUGAGACCCUUUAACCGUGA | ENSG00000149639 | SOGA1       | 0.909        |
| 43 | miR-125a-5p | >UCCCUGAGACCCUUUAACCGUGA | ENSG00000125347 | IRF1        | 0.909        |
| 44 | miR-125a-5p | >UCCCUGAGACCCUUUAACCGUGA | ENSG00000197013 | ZNF429      | 0.909        |
| 45 | miR-125a-5p | >UCCCUGAGACCCUUUAACCGUGA | ENSG00000177595 | PIDD1       | 0.908        |
| 46 | miR-125a-5p | >UCCCUGAGACCCUUUAACCGUGA | ENSG00000122133 | PAEP        | 0.906        |
| 47 | miR-125a-5p | >UCCCUGAGACCCUUUAACCGUGA | ENSG00000179532 | DNHD1       | 0.906        |
| 48 | miR-125a-5p | >UCCCUGAGACCCUUUAACCGUGA | ENSG00000173230 | GOLGB1      | 0.906        |
| 49 | miR-125a-5p | >UCCCUGAGACCCUUUAACCGUGA | ENSG00000196950 | SLC39A10    | 0.905        |
| 50 | miR-125a-5p | >UCCCUGAGACCCUUUAACCGUGA | ENSG00000205476 | CCDC85C     | 0.905        |
| 51 | miR-125a-5p | >UCCCUGAGACCCUUUAACCGUGA | ENSG00000078043 | PIAS2       | 0.904        |
| 52 | miR-125a-5p | >UCCCUGAGACCCUUUAACCGUGA | ENSG00000241644 | INMT        | 0.904        |
| 53 | miR-125a-5p | >UCCCUGAGACCCUUUAACCGUGA | ENSG00000113552 | GNPDA1      | 0.904        |

|     |             |                          |                 |          |       |
|-----|-------------|--------------------------|-----------------|----------|-------|
| 54  | miR-125a-5p | >UCCCUGAGACCCUUUAACCGUGA | ENSG00000185010 | F8       | 0.904 |
| 55  | miR-125a-5p | >UCCCUGAGACCCUUUAACCGUGA | ENSG00000184154 | LRTOMT   | 0.902 |
| 56  | miR-125a-5p | >UCCCUGAGACCCUUUAACCGUGA | ENSG00000177181 | RIMKLA   | 0.902 |
| 57  | miR-125a-5p | >UCCCUGAGACCCUUUAACCGUGA | ENSG00000168792 | ABHD15   | 0.901 |
| 58  | miR-125a-5p | >UCCCUGAGACCCUUUAACCGUGA | ENSG00000009954 | BAZ1B    | 0.900 |
| 59  | miR-125a-5p | >UCCCUGAGACCCUUUAACCGUGA | ENSG00000234857 | BSCL2    | 0.900 |
| 60  | miR-125a-5p | >UCCCUGAGACCCUUUAACCGUGA | ENSG00000165119 | HNRNPK   | 0.899 |
| 61  | miR-125a-5p | >UCCCUGAGACCCUUUAACCGUGA | ENSG00000188730 | VWC2     | 0.899 |
| 62  | miR-125a-5p | >UCCCUGAGACCCUUUAACCGUGA | ENSG00000156282 | CLDN17   | 0.899 |
| 63  | miR-125a-5p | >UCCCUGAGACCCUUUAACCGUGA | ENSG00000141098 | GFOD2    | 0.898 |
| 64  | miR-125a-5p | >UCCCUGAGACCCUUUAACCGUGA | ENSG00000007237 | GAS7     | 0.898 |
| 65  | miR-125a-5p | >UCCCUGAGACCCUUUAACCGUGA | ENSG00000177570 | SAMD12   | 0.897 |
| 66  | miR-125a-5p | >UCCCUGAGACCCUUUAACCGUGA | ENSG00000122884 | P4HA1    | 0.896 |
| 67  | miR-125a-5p | >UCCCUGAGACCCUUUAACCGUGA | ENSG00000124532 | MRS2     | 0.896 |
| 68  | miR-125a-5p | >UCCCUGAGACCCUUUAACCGUGA | ENSG00000008838 | MED24    | 0.896 |
| 69  | miR-125a-5p | >UCCCUGAGACCCUUUAACCGUGA | ENSG00000180901 | KCTD2    | 0.894 |
| 70  | miR-125a-5p | >UCCCUGAGACCCUUUAACCGUGA | ENSG00000188092 | GPR89B   | 0.894 |
| 71  | miR-125a-5p | >UCCCUGAGACCCUUUAACCGUGA | ENSG00000153933 | DGKE     | 0.893 |
| 72  | miR-125a-5p | >UCCCUGAGACCCUUUAACCGUGA | ENSG00000160219 | GAB3     | 0.893 |
| 73  | miR-125a-5p | >UCCCUGAGACCCUUUAACCGUGA | ENSG00000117262 | GPR89A   | 0.893 |
| 74  | miR-125a-5p | >UCCCUGAGACCCUUUAACCGUGA | ENSG00000137504 | CREBZF   | 0.893 |
| 75  | miR-125a-5p | >UCCCUGAGACCCUUUAACCGUGA | ENSG00000176225 | RTTN     | 0.892 |
| 76  | miR-125a-5p | >UCCCUGAGACCCUUUAACCGUGA | ENSG00000141837 | CACNA1A  | 0.892 |
| 77  | miR-125a-5p | >UCCCUGAGACCCUUUAACCGUGA | ENSG00000069275 | NUCKS1   | 0.892 |
| 78  | miR-125a-5p | >UCCCUGAGACCCUUUAACCGUGA | ENSG00000147044 | CASK     | 0.892 |
| 79  | miR-125a-5p | >UCCCUGAGACCCUUUAACCGUGA | ENSG00000123500 | COL10A1  | 0.891 |
| 80  | miR-125a-5p | >UCCCUGAGACCCUUUAACCGUGA | ENSG00000168447 | SCNN1B   | 0.887 |
| 81  | miR-125a-5p | >UCCCUGAGACCCUUUAACCGUGA | ENSG00000100505 | TRIM9    | 0.886 |
| 82  | miR-125a-5p | >UCCCUGAGACCCUUUAACCGUGA | ENSG00000074356 | NCBP3    | 0.886 |
| 83  | miR-125a-5p | >UCCCUGAGACCCUUUAACCGUGA | ENSG00000186642 | PDE2A    | 0.886 |
| 84  | miR-125a-5p | >UCCCUGAGACCCUUUAACCGUGA | ENSG00000068323 | TFE3     | 0.885 |
| 85  | miR-125a-5p | >UCCCUGAGACCCUUUAACCGUGA | ENSG00000100814 | CCNB1IP1 | 0.885 |
| 86  | miR-125a-5p | >UCCCUGAGACCCUUUAACCGUGA | ENSG00000149091 | DGKZ     | 0.884 |
| 87  | miR-125a-5p | >UCCCUGAGACCCUUUAACCGUGA | ENSG00000244411 | KRTAP5-7 | 0.884 |
| 88  | miR-125a-5p | >UCCCUGAGACCCUUUAACCGUGA | ENSG00000138442 | WDR12    | 0.883 |
| 89  | miR-125a-5p | >UCCCUGAGACCCUUUAACCGUGA | ENSG00000088888 | MAVS     | 0.883 |
| 90  | miR-125a-5p | >UCCCUGAGACCCUUUAACCGUGA | ENSG00000184313 | MROH7    | 0.882 |
| 91  | miR-125a-5p | >UCCCUGAGACCCUUUAACCGUGA | ENSG00000135018 | UBQLN1   | 0.882 |
| 92  | miR-125a-5p | >UCCCUGAGACCCUUUAACCGUGA | ENSG00000132481 | TRIM47   | 0.881 |
| 93  | miR-125a-5p | >UCCCUGAGACCCUUUAACCGUGA | ENSG00000126773 | PCNX4    | 0.880 |
| 94  | miR-125a-5p | >UCCCUGAGACCCUUUAACCGUGA | ENSG00000101290 | CDS2     | 0.880 |
| 95  | miR-125a-5p | >UCCCUGAGACCCUUUAACCGUGA | ENSG00000108848 | LUC7L3   | 0.880 |
| 96  | miR-125a-5p | >UCCCUGAGACCCUUUAACCGUGA | ENSG00000100580 | TMED8    | 0.879 |
| 97  | miR-125a-5p | >UCCCUGAGACCCUUUAACCGUGA | ENSG00000114867 | EIF4G1   | 0.878 |
| 98  | miR-125a-5p | >UCCCUGAGACCCUUUAACCGUGA | ENSG00000121406 | ZNF549   | 0.878 |
| 99  | miR-125a-5p | >UCCCUGAGACCCUUUAACCGUGA | ENSG00000001497 | LASIL    | 0.878 |
| 100 | miR-125a-5p | >UCCCUGAGACCCUUUAACCGUGA | ENSG00000100813 | ACIN1    | 0.877 |
| 101 | miR-125a-5p | >UCCCUGAGACCCUUUAACCGUGA | ENSG00000183753 | BPY2     | 0.876 |
| 102 | miR-125a-5p | >UCCCUGAGACCCUUUAACCGUGA | ENSG00000163866 | SMIM12   | 0.876 |
| 103 | miR-125a-5p | >UCCCUGAGACCCUUUAACCGUGA | ENSG00000196182 | STK40    | 0.876 |
| 104 | miR-125a-5p | >UCCCUGAGACCCUUUAACCGUGA | ENSG00000066933 | MYO9A    | 0.876 |
| 105 | miR-125a-5p | >UCCCUGAGACCCUUUAACCGUGA | ENSG00000196535 | MYO18A   | 0.874 |
| 106 | miR-125a-5p | >UCCCUGAGACCCUUUAACCGUGA | ENSG00000151789 | ZNF385D  | 0.874 |
| 107 | miR-125a-5p | >UCCCUGAGACCCUUUAACCGUGA | ENSG00000132510 | KDM6B    | 0.873 |
| 108 | miR-125a-5p | >UCCCUGAGACCCUUUAACCGUGA | ENSG00000167447 | SMG8     | 0.873 |
| 109 | miR-125a-5p | >UCCCUGAGACCCUUUAACCGUGA | ENSG00000265491 | RNF115   | 0.873 |
| 110 | miR-125a-5p | >UCCCUGAGACCCUUUAACCGUGA | ENSG00000183795 | BPY2B    | 0.873 |

|     |             |                            |                 |            |       |
|-----|-------------|----------------------------|-----------------|------------|-------|
| 111 | miR-125a-5p | >UCCCUGAGACCCUUUAACCUUGUGA | ENSG00000160959 | LRRC14     | 0.872 |
| 112 | miR-125a-5p | >UCCCUGAGACCCUUUAACCUUGUGA | ENSG00000185894 | BPY2C      | 0.872 |
| 113 | miR-125a-5p | >UCCCUGAGACCCUUUAACCUUGUGA | ENSG00000177084 | POLE       | 0.872 |
| 114 | miR-125a-5p | >UCCCUGAGACCCUUUAACCUUGUGA | ENSG00000143093 | STRIP1     | 0.872 |
| 115 | miR-125a-5p | >UCCCUGAGACCCUUUAACCUUGUGA | ENSG00000123066 | MED13L     | 0.871 |
| 116 | miR-125a-5p | >UCCCUGAGACCCUUUAACCUUGUGA | ENSG00000156675 | RAB11FIP1  | 0.871 |
| 117 | miR-125a-5p | >UCCCUGAGACCCUUUAACCUUGUGA | ENSG00000103855 | CD276      | 0.870 |
| 118 | miR-125a-5p | >UCCCUGAGACCCUUUAACCUUGUGA | ENSG00000168026 | TTC21A     | 0.870 |
| 119 | miR-125a-5p | >UCCCUGAGACCCUUUAACCUUGUGA | ENSG00000161298 | ZNF382     | 0.870 |
| 120 | miR-125a-5p | >UCCCUGAGACCCUUUAACCUUGUGA | ENSG00000073331 | ALPK1      | 0.868 |
| 121 | miR-125a-5p | >UCCCUGAGACCCUUUAACCUUGUGA | ENSG00000164338 | UTP15      | 0.868 |
| 122 | miR-125a-5p | >UCCCUGAGACCCUUUAACCUUGUGA | ENSG00000099810 | MTAP       | 0.867 |
| 123 | miR-125a-5p | >UCCCUGAGACCCUUUAACCUUGUGA | ENSG00000132589 | FLOT2      | 0.867 |
| 124 | miR-125a-5p | >UCCCUGAGACCCUUUAACCUUGUGA | ENSG00000124783 | SSR1       | 0.866 |
| 125 | miR-125a-5p | >UCCCUGAGACCCUUUAACCUUGUGA | ENSG00000273079 | GRIN2B     | 0.866 |
| 126 | miR-125a-5p | >UCCCUGAGACCCUUUAACCUUGUGA | ENSG00000129566 | TEP1       | 0.865 |
| 127 | miR-125a-5p | >UCCCUGAGACCCUUUAACCUUGUGA | ENSG00000261371 | PECAM1     | 0.865 |
| 128 | miR-125a-5p | >UCCCUGAGACCCUUUAACCUUGUGA | ENSG00000143669 | LYST       | 0.864 |
| 129 | miR-125a-5p | >UCCCUGAGACCCUUUAACCUUGUGA | ENSG00000148842 | CNNM2      | 0.864 |
| 130 | miR-125a-5p | >UCCCUGAGACCCUUUAACCUUGUGA | ENSG00000163354 | DCST2      | 0.864 |
| 131 | miR-125a-5p | >UCCCUGAGACCCUUUAACCUUGUGA | ENSG00000135902 | CHRND      | 0.863 |
| 132 | miR-125a-5p | >UCCCUGAGACCCUUUAACCUUGUGA | ENSG00000171476 | HOPX       | 0.863 |
| 133 | miR-125a-5p | >UCCCUGAGACCCUUUAACCUUGUGA | ENSG00000129691 | ASH2L      | 0.863 |
| 134 | miR-125a-5p | >UCCCUGAGACCCUUUAACCUUGUGA | ENSG00000171303 | KCNK3      | 0.861 |
| 135 | miR-125a-5p | >UCCCUGAGACCCUUUAACCUUGUGA | ENSG00000180592 | SKIDA1     | 0.860 |
| 136 | miR-125a-5p | >UCCCUGAGACCCUUUAACCUUGUGA | ENSG00000112763 | BTN2A1     | 0.860 |
| 137 | miR-125a-5p | >UCCCUGAGACCCUUUAACCUUGUGA | ENSG00000183196 | CHST6      | 0.858 |
| 138 | miR-125a-5p | >UCCCUGAGACCCUUUAACCUUGUGA | ENSG00000055609 | KMT2C      | 0.858 |
| 139 | miR-125a-5p | >UCCCUGAGACCCUUUAACCUUGUGA | ENSG00000132153 | DHX30      | 0.857 |
| 140 | miR-125a-5p | >UCCCUGAGACCCUUUAACCUUGUGA | ENSG00000173013 | CCDC96     | 0.856 |
| 141 | miR-125a-5p | >UCCCUGAGACCCUUUAACCUUGUGA | ENSG00000154080 | CHST9      | 0.854 |
| 142 | miR-125a-5p | >UCCCUGAGACCCUUUAACCUUGUGA | ENSG00000142784 | WDTC1      | 0.854 |
| 143 | miR-125a-5p | >UCCCUGAGACCCUUUAACCUUGUGA | ENSG00000129473 | BCL2L2     | 0.853 |
| 144 | miR-125a-5p | >UCCCUGAGACCCUUUAACCUUGUGA | ENSG00000104343 | UBE2W      | 0.853 |
| 145 | miR-125a-5p | >UCCCUGAGACCCUUUAACCUUGUGA | ENSG00000122012 | SV2C       | 0.853 |
| 146 | miR-125a-5p | >UCCCUGAGACCCUUUAACCUUGUGA | ENSG00000134216 | CHIA       | 0.853 |
| 147 | miR-125a-5p | >UCCCUGAGACCCUUUAACCUUGUGA | ENSG00000181652 | ATG9B      | 0.853 |
| 148 | miR-125a-5p | >UCCCUGAGACCCUUUAACCUUGUGA | ENSG00000107331 | ABCA2      | 0.853 |
| 149 | miR-125a-5p | >UCCCUGAGACCCUUUAACCUUGUGA | ENSG00000248487 | ABHD14A    | 0.853 |
| 150 | miR-125a-5p | >UCCCUGAGACCCUUUAACCUUGUGA | ENSG00000178690 | DYNAP      | 0.852 |
| 151 | miR-125a-5p | >UCCCUGAGACCCUUUAACCUUGUGA | ENSG00000054118 | THRAP3     | 0.851 |
| 152 | miR-125a-5p | >UCCCUGAGACCCUUUAACCUUGUGA | ENSG00000155858 | LSM11      | 0.851 |
| 153 | miR-125a-5p | >UCCCUGAGACCCUUUAACCUUGUGA | ENSG00000135476 | ESPL1      | 0.851 |
| 154 | miR-125a-5p | >UCCCUGAGACCCUUUAACCUUGUGA | ENSG00000214517 | PPME1      | 0.850 |
| 155 | miR-125a-5p | >UCCCUGAGACCCUUUAACCUUGUGA | ENSG00000205531 | NAP1L4     | 0.849 |
| 156 | miR-125a-5p | >UCCCUGAGACCCUUUAACCUUGUGA | ENSG00000133477 | FAM83F     | 0.849 |
| 157 | miR-125a-5p | >UCCCUGAGACCCUUUAACCUUGUGA | ENSG00000118922 | KLF12      | 0.849 |
| 158 | miR-125a-5p | >UCCCUGAGACCCUUUAACCUUGUGA | ENSG00000163632 | C3orf49    | 0.849 |
| 159 | miR-125a-5p | >UCCCUGAGACCCUUUAACCUUGUGA | ENSG00000139636 | LMBR1L     | 0.849 |
| 160 | miR-125a-5p | >UCCCUGAGACCCUUUAACCUUGUGA | ENSG00000213064 | SFT2D2     | 0.849 |
| 161 | miR-125a-5p | >UCCCUGAGACCCUUUAACCUUGUGA | ENSG00000079385 | CEACAM1    | 0.848 |
| 162 | miR-125a-5p | >UCCCUGAGACCCUUUAACCUUGUGA | ENSG00000106144 | CASP2      | 0.847 |
| 163 | miR-125a-5p | >UCCCUGAGACCCUUUAACCUUGUGA | ENSG00000116852 | KIF21B     | 0.847 |
| 164 | miR-125a-5p | >UCCCUGAGACCCUUUAACCUUGUGA | ENSG00000107147 | KCNT1      | 0.847 |
| 165 | miR-125a-5p | >UCCCUGAGACCCUUUAACCUUGUGA | ENSG00000174804 | FZD4       | 0.847 |
| 166 | miR-125a-5p | >UCCCUGAGACCCUUUAACCUUGUGA | ENSG00000214160 | ALG3       | 0.845 |
| 167 | miR-125a-5p | >UCCCUGAGACCCUUUAACCUUGUGA | ENSG00000243696 | AC006254.1 | 0.845 |

|     |             |                          |                 |            |       |
|-----|-------------|--------------------------|-----------------|------------|-------|
| 168 | miR-125a-5p | >UCCCUGAGACCCUUUAACCUUGA | ENSG00000180828 | BHLHE22    | 0.844 |
| 169 | miR-125a-5p | >UCCCUGAGACCCUUUAACCUUGA | ENSG00000136383 | ALPK3      | 0.843 |
| 170 | miR-125a-5p | >UCCCUGAGACCCUUUAACCUUGA | ENSG00000116396 | KCNC4      | 0.842 |
| 171 | miR-125a-5p | >UCCCUGAGACCCUUUAACCUUGA | ENSG00000182557 | SPNS3      | 0.842 |
| 172 | miR-125a-5p | >UCCCUGAGACCCUUUAACCUUGA | ENSG00000198929 | NOS1AP     | 0.842 |
| 173 | miR-125a-5p | >UCCCUGAGACCCUUUAACCUUGA | ENSG00000167106 | FAM102A    | 0.842 |
| 174 | miR-125a-5p | >UCCCUGAGACCCUUUAACCUUGA | ENSG00000135597 | REPS1      | 0.841 |
| 175 | miR-125a-5p | >UCCCUGAGACCCUUUAACCUUGA | ENSG00000103064 | SLC7A6     | 0.840 |
| 176 | miR-125a-5p | >UCCCUGAGACCCUUUAACCUUGA | ENSG00000189067 | LITAF      | 0.840 |
| 177 | miR-125a-5p | >UCCCUGAGACCCUUUAACCUUGA | ENSG00000141252 | VPS53      | 0.840 |
| 178 | miR-125a-5p | >UCCCUGAGACCCUUUAACCUUGA | ENSG00000177731 | FLII       | 0.839 |
| 179 | miR-125a-5p | >UCCCUGAGACCCUUUAACCUUGA | ENSG00000196092 | PAX5       | 0.837 |
| 180 | miR-125a-5p | >UCCCUGAGACCCUUUAACCUUGA | ENSG00000155229 | MMS19      | 0.837 |
| 181 | miR-125a-5p | >UCCCUGAGACCCUUUAACCUUGA | ENSG00000112218 | GPR63      | 0.836 |
| 182 | miR-125a-5p | >UCCCUGAGACCCUUUAACCUUGA | ENSG00000241598 | KRTAP5-4   | 0.836 |
| 183 | miR-125a-5p | >UCCCUGAGACCCUUUAACCUUGA | ENSG00000101445 | PPP1R16B   | 0.836 |
| 184 | miR-125a-5p | >UCCCUGAGACCCUUUAACCUUGA | ENSG00000185219 | ZNF445     | 0.835 |
| 185 | miR-125a-5p | >UCCCUGAGACCCUUUAACCUUGA | ENSG00000123338 | NCKAP1L    | 0.834 |
| 186 | miR-125a-5p | >UCCCUGAGACCCUUUAACCUUGA | ENSG00000179088 | C12orf42   | 0.833 |
| 187 | miR-125a-5p | >UCCCUGAGACCCUUUAACCUUGA | ENSG00000137522 | RNF121     | 0.832 |
| 188 | miR-125a-5p | >UCCCUGAGACCCUUUAACCUUGA | ENSG00000132872 | SYT4       | 0.832 |
| 189 | miR-125a-5p | >UCCCUGAGACCCUUUAACCUUGA | ENSG00000130713 | EXOSC2     | 0.831 |
| 190 | miR-125a-5p | >UCCCUGAGACCCUUUAACCUUGA | ENSG00000168267 | PTF1A      | 0.831 |
| 191 | miR-125a-5p | >UCCCUGAGACCCUUUAACCUUGA | ENSG00000135451 | TROAP      | 0.831 |
| 192 | miR-125a-5p | >UCCCUGAGACCCUUUAACCUUGA | ENSG00000057935 | MTA3       | 0.831 |
| 193 | miR-125a-5p | >UCCCUGAGACCCUUUAACCUUGA | ENSG00000152455 | SUV39H2    | 0.830 |
| 194 | miR-125a-5p | >UCCCUGAGACCCUUUAACCUUGA | ENSG00000173926 | 3-Mar      | 0.829 |
| 195 | miR-125a-5p | >UCCCUGAGACCCUUUAACCUUGA | ENSG00000141452 | C18orf8    | 0.829 |
| 196 | miR-125a-5p | >UCCCUGAGACCCUUUAACCUUGA | ENSG00000128510 | CPA4       | 0.828 |
| 197 | miR-125a-5p | >UCCCUGAGACCCUUUAACCUUGA | ENSG00000106330 | MOSPD3     | 0.828 |
| 198 | miR-125a-5p | >UCCCUGAGACCCUUUAACCUUGA | ENSG00000107105 | ELAVL2     | 0.828 |
| 199 | miR-125a-5p | >UCCCUGAGACCCUUUAACCUUGA | ENSG00000129226 | CD68       | 0.827 |
| 200 | miR-125a-5p | >UCCCUGAGACCCUUUAACCUUGA | ENSG00000140543 | DET1       | 0.826 |
| 201 | miR-125a-5p | >UCCCUGAGACCCUUUAACCUUGA | ENSG00000140548 | ZNF710     | 0.826 |
| 202 | miR-125a-5p | >UCCCUGAGACCCUUUAACCUUGA | ENSG00000143126 | CELSR2     | 0.825 |
| 203 | miR-125a-5p | >UCCCUGAGACCCUUUAACCUUGA | ENSG00000143190 | POU2F1     | 0.825 |
| 204 | miR-125a-5p | >UCCCUGAGACCCUUUAACCUUGA | ENSG00000119227 | PIGZ       | 0.825 |
| 205 | miR-125a-5p | >UCCCUGAGACCCUUUAACCUUGA | ENSG00000157927 | RADIL      | 0.824 |
| 206 | miR-125a-5p | >UCCCUGAGACCCUUUAACCUUGA | ENSG00000101096 | NFATC2     | 0.824 |
| 207 | miR-125a-5p | >UCCCUGAGACCCUUUAACCUUGA | ENSG00000065135 | GNAI3      | 0.823 |
| 208 | miR-125a-5p | >UCCCUGAGACCCUUUAACCUUGA | ENSG00000256043 | CTSO       | 0.822 |
| 209 | miR-125a-5p | >UCCCUGAGACCCUUUAACCUUGA | ENSG00000072864 | NDE1       | 0.822 |
| 210 | miR-125a-5p | >UCCCUGAGACCCUUUAACCUUGA | ENSG00000244476 | ERVFRD-1   | 0.821 |
| 211 | miR-125a-5p | >UCCCUGAGACCCUUUAACCUUGA | ENSG00000204116 | CHIC1      | 0.820 |
| 212 | miR-125a-5p | >UCCCUGAGACCCUUUAACCUUGA | ENSG00000146067 | FAM193B    | 0.819 |
| 213 | miR-125a-5p | >UCCCUGAGACCCUUUAACCUUGA | ENSG00000084112 | SSH1       | 0.819 |
| 214 | miR-125a-5p | >UCCCUGAGACCCUUUAACCUUGA | ENSG00000155629 | PIK3AP1    | 0.818 |
| 215 | miR-125a-5p | >UCCCUGAGACCCUUUAACCUUGA | ENSG00000114030 | KPNA1      | 0.818 |
| 216 | miR-125a-5p | >UCCCUGAGACCCUUUAACCUUGA | ENSG00000116667 | C1orf21    | 0.818 |
| 217 | miR-125a-5p | >UCCCUGAGACCCUUUAACCUUGA | ENSG00000157954 | WIPI2      | 0.818 |
| 218 | miR-125a-5p | >UCCCUGAGACCCUUUAACCUUGA | ENSG00000077782 | FGFR1      | 0.818 |
| 219 | miR-125a-5p | >UCCCUGAGACCCUUUAACCUUGA | ENSG00000140090 | SLC24A4    | 0.817 |
| 220 | miR-125a-5p | >UCCCUGAGACCCUUUAACCUUGA | ENSG00000114491 | UMPS       | 0.817 |
| 221 | miR-125a-5p | >UCCCUGAGACCCUUUAACCUUGA | ENSG00000186187 | ZNRF1      | 0.817 |
| 222 | miR-125a-5p | >UCCCUGAGACCCUUUAACCUUGA | ENSG00000179361 | ARID3B     | 0.817 |
| 223 | miR-125a-5p | >UCCCUGAGACCCUUUAACCUUGA | ENSG00000182256 | GABRG3     | 0.816 |
| 224 | miR-125a-5p | >UCCCUGAGACCCUUUAACCUUGA | ENSG00000262304 | AC027796.3 | 0.815 |

|     |             |                          |                 |            |       |
|-----|-------------|--------------------------|-----------------|------------|-------|
| 225 | miR-125a-5p | >UCCCUGAGACCCUUUAACCGUGA | ENSG00000166183 | ASPG       | 0.815 |
| 226 | miR-125a-5p | >UCCCUGAGACCCUUUAACCGUGA | ENSG00000163637 | PRICKLE2   | 0.814 |
| 227 | miR-125a-5p | >UCCCUGAGACCCUUUAACCGUGA | ENSG00000156103 | MMP16      | 0.814 |
| 228 | miR-125a-5p | >UCCCUGAGACCCUUUAACCGUGA | ENSG00000175387 | SMAD2      | 0.813 |
| 229 | miR-125a-5p | >UCCCUGAGACCCUUUAACCGUGA | ENSG00000111737 | RAB35      | 0.813 |
| 230 | miR-125a-5p | >UCCCUGAGACCCUUUAACCGUGA | ENSG00000110427 | KIAA1549L  | 0.813 |
| 231 | miR-125a-5p | >UCCCUGAGACCCUUUAACCGUGA | ENSG00000106462 | EZH2       | 0.812 |
| 232 | miR-125a-5p | >UCCCUGAGACCCUUUAACCGUGA | ENSG00000092847 | AGO1       | 0.812 |
| 233 | miR-125a-5p | >UCCCUGAGACCCUUUAACCGUGA | ENSG00000049192 | ADAMTS6    | 0.812 |
| 234 | miR-125a-5p | >UCCCUGAGACCCUUUAACCGUGA | ENSG00000118946 | PCDH17     | 0.812 |
| 235 | miR-125a-5p | >UCCCUGAGACCCUUUAACCGUGA | ENSG00000101638 | ST8SIA5    | 0.811 |
| 236 | miR-125a-5p | >UCCCUGAGACCCUUUAACCGUGA | ENSG00000138380 | CARF       | 0.811 |
| 237 | miR-125a-5p | >UCCCUGAGACCCUUUAACCGUGA | ENSG00000115252 | PDE1A      | 0.811 |
| 238 | miR-125a-5p | >UCCCUGAGACCCUUUAACCGUGA | ENSG00000116299 | KIAA1324   | 0.809 |
| 239 | miR-125a-5p | >UCCCUGAGACCCUUUAACCGUGA | ENSG00000255104 | AC005324.4 | 0.809 |
| 240 | miR-125a-5p | >UCCCUGAGACCCUUUAACCGUGA | ENSG00000103168 | TAF1C      | 0.809 |
| 241 | miR-125a-5p | >UCCCUGAGACCCUUUAACCGUGA | ENSG00000175646 | PRM1       | 0.809 |
| 242 | miR-125a-5p | >UCCCUGAGACCCUUUAACCGUGA | ENSG00000163125 | RPRD2      | 0.809 |
| 243 | miR-125a-5p | >UCCCUGAGACCCUUUAACCGUGA | ENSG00000130529 | TRPM4      | 0.807 |
| 244 | miR-125a-5p | >UCCCUGAGACCCUUUAACCGUGA | ENSG00000153721 | CNKSR3     | 0.807 |
| 245 | miR-125a-5p | >UCCCUGAGACCCUUUAACCGUGA | ENSG00000134780 | DAGLA      | 0.807 |
| 246 | miR-125a-5p | >UCCCUGAGACCCUUUAACCGUGA | ENSG00000125484 | GTF3C4     | 0.806 |
| 247 | miR-125a-5p | >UCCCUGAGACCCUUUAACCGUGA | ENSG00000090539 | CHRD       | 0.806 |
| 248 | miR-125a-5p | >UCCCUGAGACCCUUUAACCGUGA | ENSG00000058335 | RASGRF1    | 0.806 |
| 249 | miR-125a-5p | >UCCCUGAGACCCUUUAACCGUGA | ENSG00000068724 | TTC7A      | 0.806 |
| 250 | miR-125a-5p | >UCCCUGAGACCCUUUAACCGUGA | ENSG00000120088 | CRHR1      | 0.806 |
| 251 | miR-125a-5p | >UCCCUGAGACCCUUUAACCGUGA | ENSG00000167992 | VWCE       | 0.806 |
| 252 | miR-125a-5p | >UCCCUGAGACCCUUUAACCGUGA | ENSG00000125952 | MAX        | 0.805 |
| 253 | miR-125a-5p | >UCCCUGAGACCCUUUAACCGUGA | ENSG00000117569 | PTBP2      | 0.804 |
| 254 | miR-125a-5p | >UCCCUGAGACCCUUUAACCGUGA | ENSG00000176490 | DIRAS1     | 0.803 |
| 255 | miR-125a-5p | >UCCCUGAGACCCUUUAACCGUGA | ENSG00000164076 | CAMKV      | 0.803 |
| 256 | miR-125a-5p | >UCCCUGAGACCCUUUAACCGUGA | ENSG00000275832 | ARHGAP23   | 0.803 |
| 257 | miR-125a-5p | >UCCCUGAGACCCUUUAACCGUGA | ENSG00000113269 | RNF130     | 0.803 |
| 258 | miR-125a-5p | >UCCCUGAGACCCUUUAACCGUGA | ENSG00000143515 | ATP8B2     | 0.802 |
| 259 | miR-125a-5p | >UCCCUGAGACCCUUUAACCGUGA | ENSG00000112234 | FBXL4      | 0.802 |
| 260 | miR-125a-5p | >UCCCUGAGACCCUUUAACCGUGA | ENSG00000137274 | BPHL       | 0.801 |
| 261 | miR-125a-5p | >UCCCUGAGACCCUUUAACCGUGA | ENSG00000116260 | QSOX1      | 0.801 |
| 262 | miR-125a-5p | >UCCCUGAGACCCUUUAACCGUGA | ENSG00000103018 | CYB5B      | 0.801 |
| 263 | miR-125a-5p | >UCCCUGAGACCCUUUAACCGUGA | ENSG00000006283 | CACNA1G    | 0.800 |
| 264 | miR-125a-5p | >UCCCUGAGACCCUUUAACCGUGA | ENSG00000143473 | KCNH1      | 0.800 |
| 265 | miR-125a-5p | >UCCCUGAGACCCUUUAACCGUGA | ENSG00000166569 | CPLX4      | 0.800 |
| 266 | miR-125a-5p | >UCCCUGAGACCCUUUAACCGUGA | ENSG00000143570 | SLC39A1    | 0.800 |
